# Supplementary material for: Copper antimony sulfide thin films for visible to near infrared photodetector applications
Source: Royal Society of Chemistry journal article supplement (doi:10.1039/c8ra05662e), 2018-01-01
Supplement: c8ra05662e1.pdf [file c8ra05662e1.pdf]

Supplementary information

## Copper Antimony Sulfide thin films for visible to near infrared photodetector application

V. Vinayakumar,<sup>a</sup> S. Shaji,<sup>a,b</sup> D. Avellaneda,<sup>a</sup> J.A. Aguilar-Martínez,<sup>a,c</sup> B. Krishnan <sup>#a,b</sup>

<sup>a</sup> Facultad de Ingeniería Mecánica y Eléctrica, Universidad Autónoma de Nuevo León, San Nicolás de los Garza, Nuevo León, 66455, México.

<sup>b</sup> Centro de Innovación, Investigación y Desarrollo en Ingeniería y Tecnología (CIIDIT)- Universidad Autónoma de Nuevo León, Parque de Investigación e Innovación Tecnológica, Apodaca, Nuevo León, 66600, México.

<sup>c</sup> Centro de Investigación e Innovación en Ingeniería Aeronáutica (CIIA); Facultad de Ingeniería Mecánica y Eléctrica, Carretera a Salinas Victoria, km. 2.3, Apodaca, Nuevo León, 66600, México.

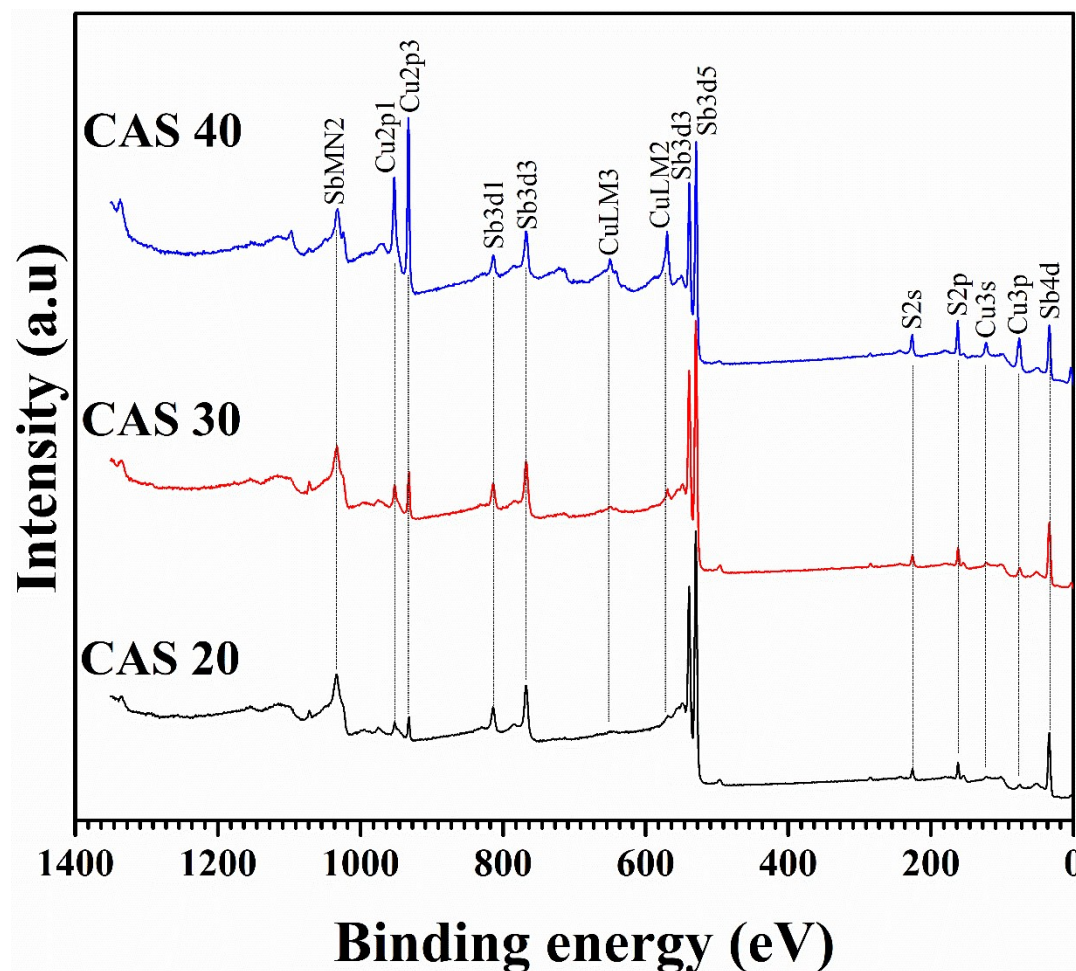

Figure S1. XPS survey spectra of CAS 20, CAS 30 and CAS 40 films.

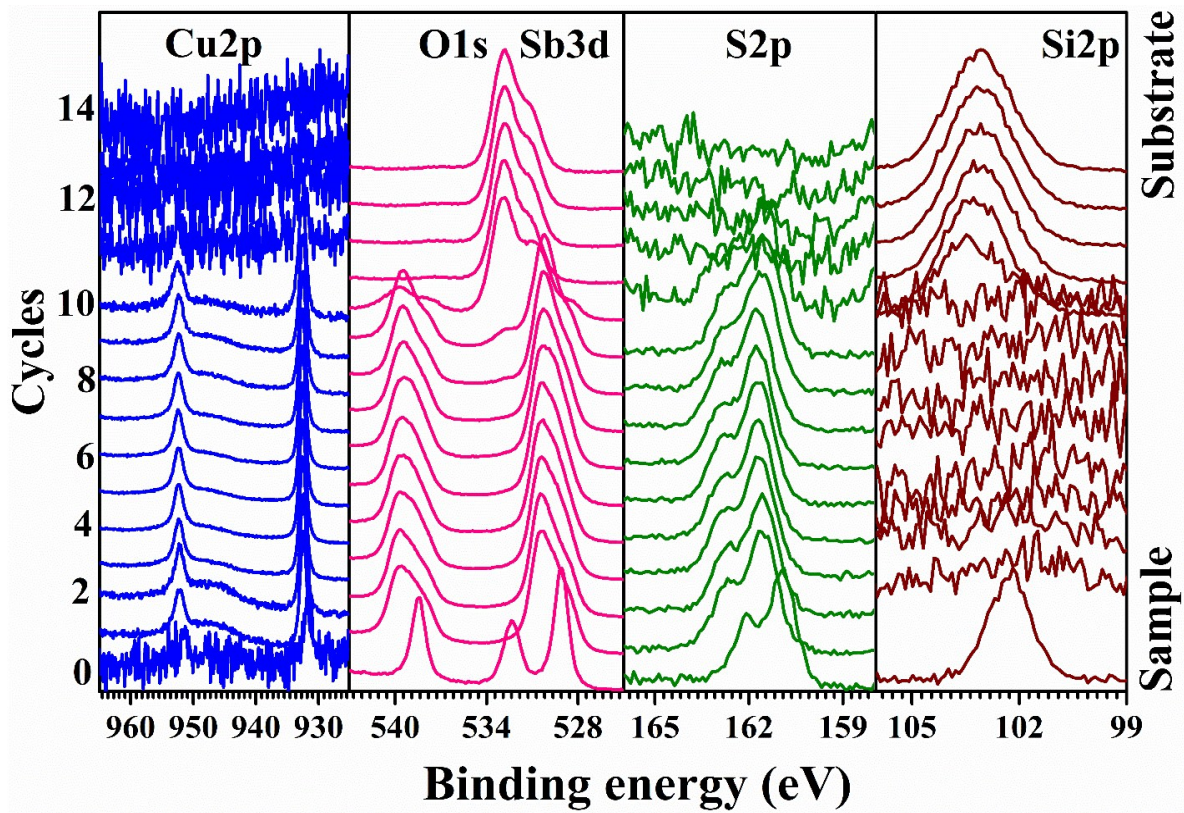

Figure S2. depth profile for composition of CAS 20 thin film.

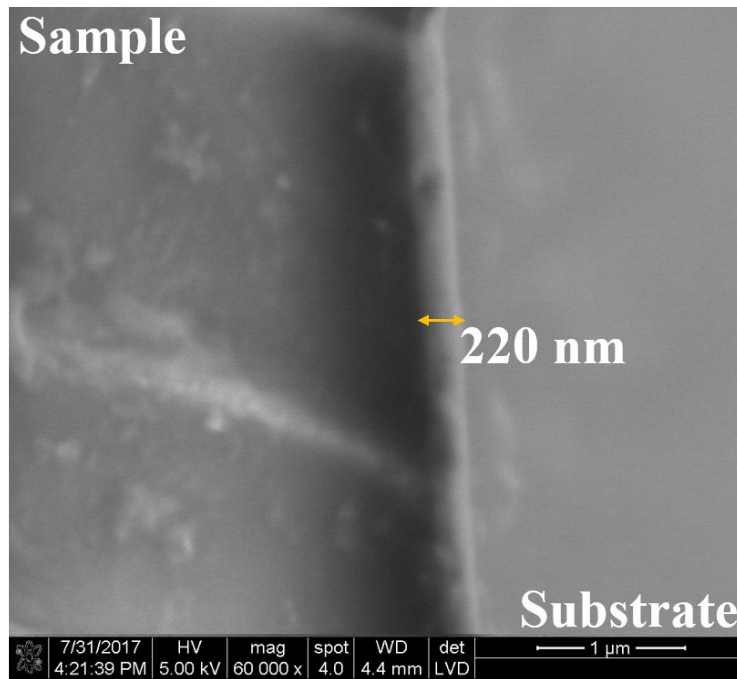

Figure S3. Cross-sectional SEM image of CAS 20 thin film.

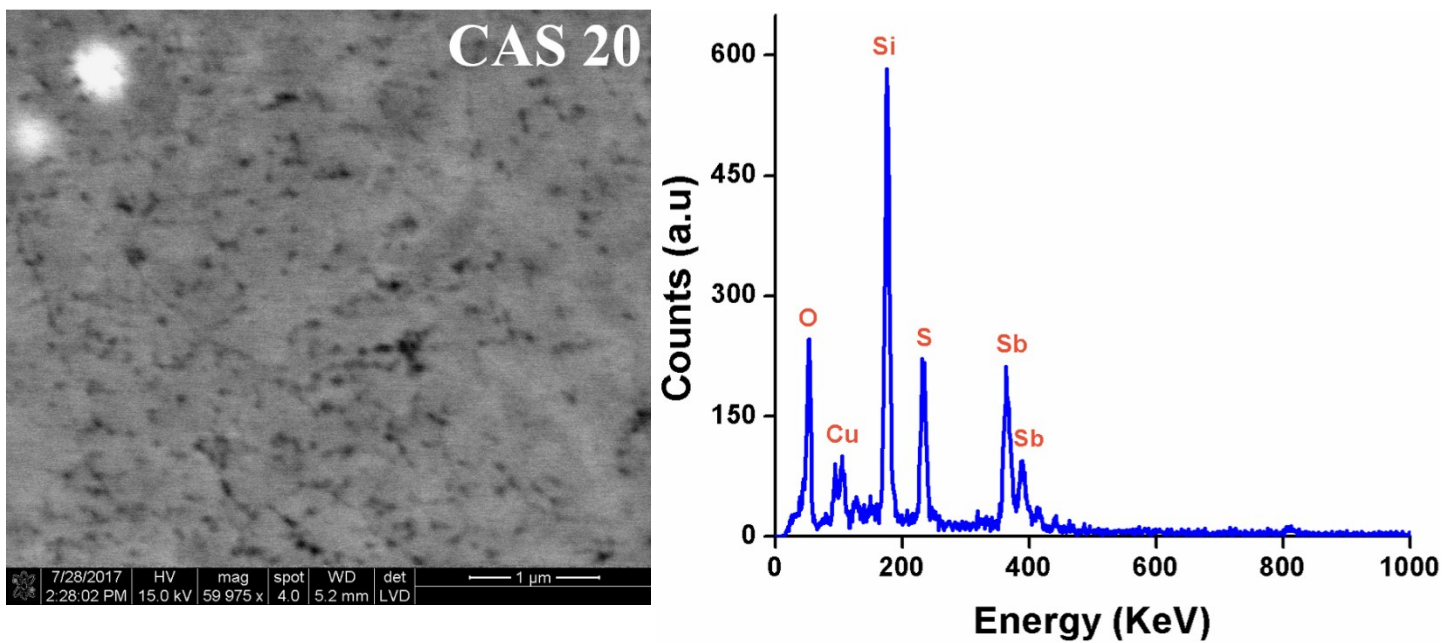

Figure S4. SEM and EDX results of CAS 20 thin film.

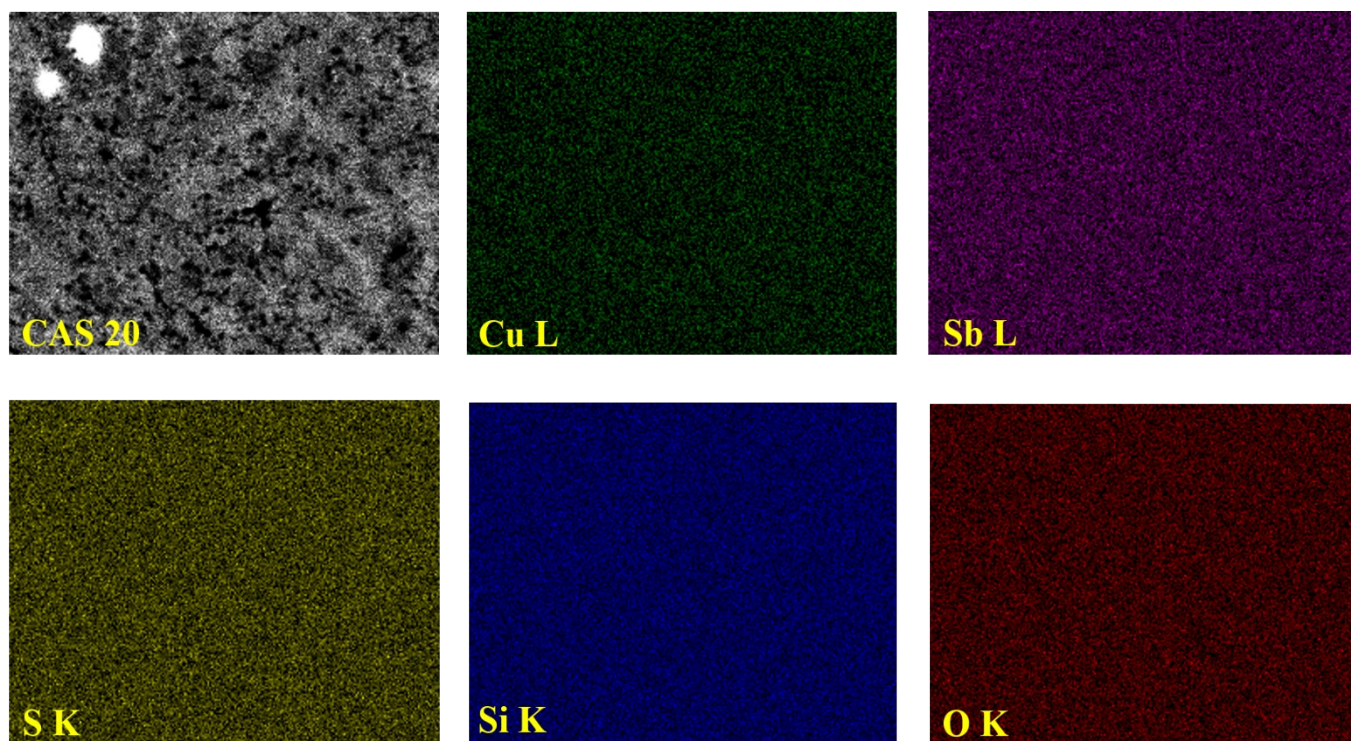

Figure S5. EDX elemental mapping of CAS 20 thin film.

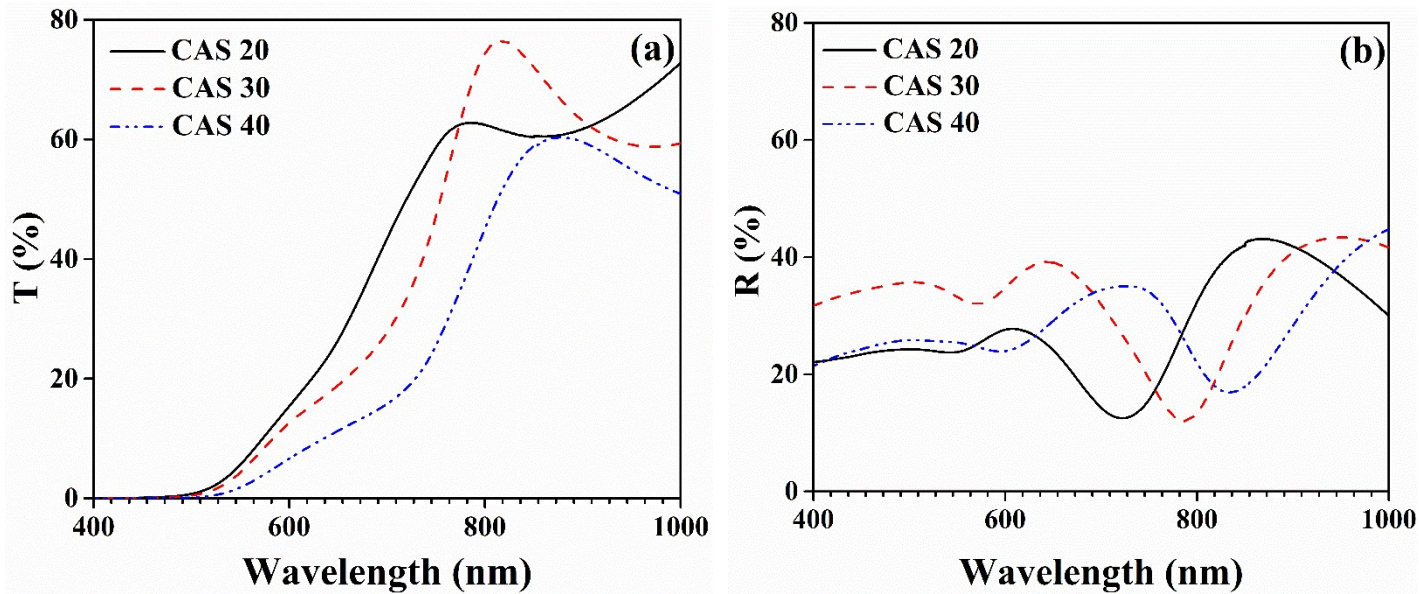

Figure S6. Transmittance (R) and Reflectance (R) spectra of CAS 20, 30 and 40 thin films

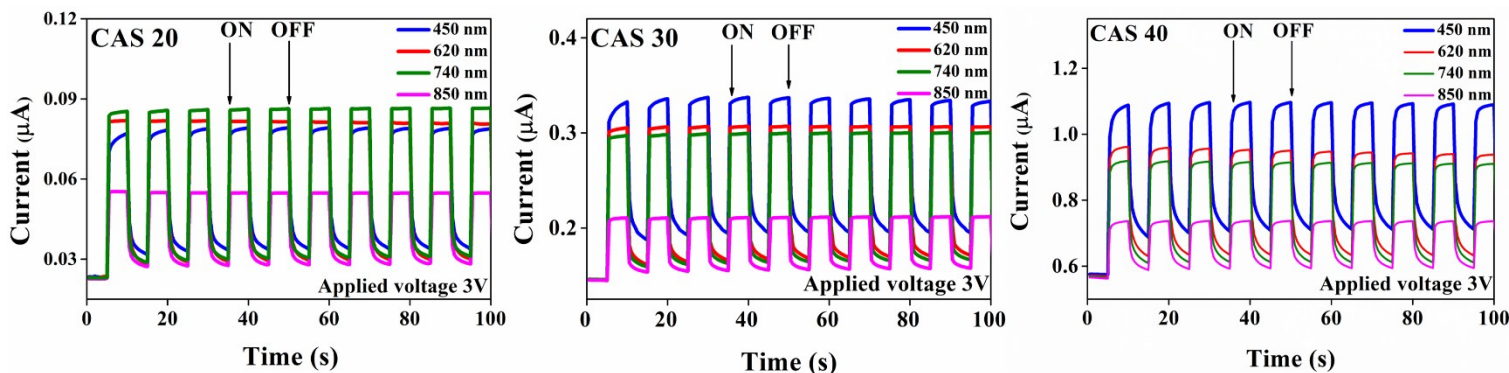

Figure S7. Switching behavior of CAS photodetector (CAS 20, CAS 30 and CAS 40) under illumination with LEDs having wavelengths 450, 620, 740 and 850 nm for bias voltage 3V.

Figure S8. Switching behavior of CAS photodetector (CAS 20, CAS 30 and CAS 40) under illumination with LEDs having wavelengths 450, 620, 740 and 850 nm for bias voltage 5V.

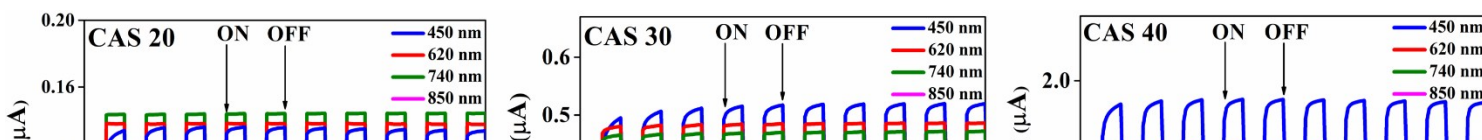

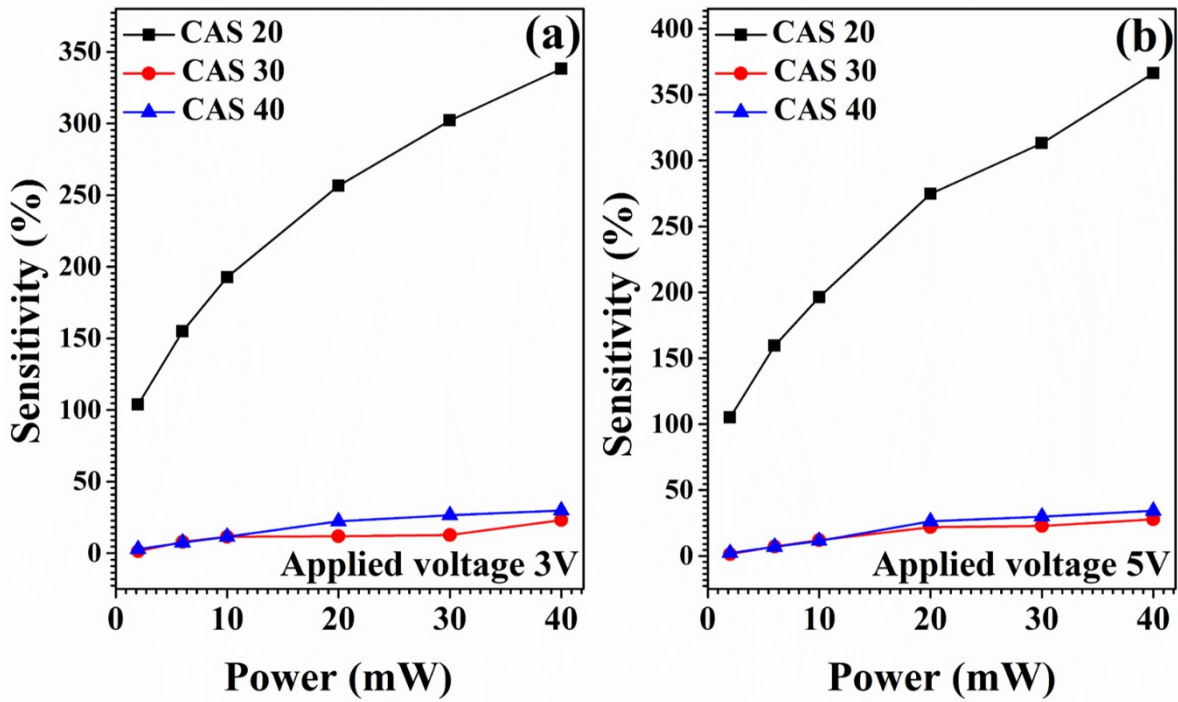

Figure S9. Laser power vs sensitivity graphs of CAS 20, CAS 30 and CAS 40 samples at applied bias voltage (a) 3V (b) 5V

Table ST1. Sensitivity measurements of CAS 20, 30 and 40 using LEDs at applied voltage 3V.

| Sample | Wavelength (nm) | $I_{\text{dark}}$ (nA) | $I_{\text{light}}$ (nA) | Sensitivity (%) |
|--------|-----------------|------------------------|-------------------------|-----------------|
| CAS 20 | 450             | 23.31                  | 74.79                   | 220.85          |
|        | 620             | 23.17                  | 81.73                   | 252.74          |
|        | 740             | 22.97                  | 84.84                   | 269.35          |
|        | 850             | 22.65                  | 55.21                   | 143.75          |
| CAS 30 | 450             | 145.47                 | 325.22                  | 123.56          |
|        | 620             | 145.30                 | 303.68                  | 109             |
|        | 740             | 145.63                 | 295.95                  | 103.22          |
|        | 850             | 145.04                 | 210.61                  | 45.21           |
| CAS 40 | 450             | 575.04                 | 1064.03                 | 85.03           |
|        | 620             | 570.93                 | 952.79                  | 66.88           |
|        | 740             | 567.68                 | 910.68                  | 60.42           |
|        | 850             | 564.34                 | 730.13                  | 29.36           |

Table ST2. Sensitivity and responsivity measurements of CAS 20, 30 and 40 at various laser power and applied voltage 3V.

| Sample | Power density (mW/cm <sup>2</sup> ) | I <sub>dark</sub> (nA) | I <sub>light</sub> (nA) | Sensitivity (%) | Responsivity (AW <sup>-1</sup> ) *10 <sup>-5</sup> |
|--------|-------------------------------------|------------------------|-------------------------|-----------------|----------------------------------------------------|
| CAS 20 | 0.8                                 | 13.3                   | 27.1                    | 103.75          | 7.01                                               |
|        | 2.4                                 | 13.5                   | 34.4                    | 154.81          | 3.54                                               |
|        | 3.9                                 | 13.5                   | 39.5                    | 192.59          | 2.64                                               |
|        | 7.9                                 | 13.8                   | 49.2                    | 256.52          | 1.80                                               |
|        | 11.8                                | 13.6                   | 55.5                    | 302.17          | 1.41                                               |
|        | 15.8                                | 13.3                   | 59.6                    | 338.23          | 1.17                                               |
| CAS 30 | 0.8                                 | 213                    | 216                     | 1.41            | 1.52                                               |
|        | 2.4                                 | 215                    | 232                     | 7.90            | 2.88                                               |
|        | 3.9                                 | 219                    | 244                     | 11.41           | 2.54                                               |
|        | 7.9                                 | 228                    | 255                     | 11.84           | 1.37                                               |
|        | 11.8                                | 229                    | 258                     | 12.36           | 0.98                                               |
|        | 15.8                                | 234                    | 288                     | 23.07           | 1.37                                               |
| CAS 40 | 0.8                                 | 588                    | 604                     | 2.72            | 8.12                                               |
|        | 2.4                                 | 631                    | 676                     | 7.30            | 7.67                                               |
|        | 3.9                                 | 641                    | 715                     | 11.38           | 7.51                                               |
|        | 7.9                                 | 636                    | 777                     | 22.16           | 7.16                                               |
|        | 11.8                                | 642                    | 813                     | 26.47           | 5.79                                               |
|        | 15.8                                | 651                    | 845                     | 29.80           | 4.93                                               |

Table ST3. Sensitivity measurements of CAS 20, 30 and 40 using LEDs at applied voltage 5V.

| Sample | Wavelength (nm) | I <sub>dark</sub> (nA) | I <sub>light</sub> (nA) | Sensitivity (%) |
|--------|-----------------|------------------------|-------------------------|-----------------|
| CAS 20 | 450             | 43.23                  | 130.19                  | 201.16          |
|        | 620             | 42.55                  | 137.85                  | 223.85          |
|        | 740             | 43.03                  | 143.38                  | 233.29          |
|        | 850             | 42.37                  | 91.82                   | 116.71          |
| CAS 30 | 450             | 220.15                 | 478.31                  | 117.27          |
|        | 620             | 219.55                 | 476.68                  | 117.11          |
|        | 740             | 219.74                 | 461.96                  | 110.23          |
|        | 850             | 219.88                 | 327.10                  | 48.76           |
| CAS 40 | 450             | 944.99                 | 1823.82                 | 93              |
|        | 620             | 943.68                 | 1617.62                 | 71.42           |
|        | 740             | 952.06                 | 1534.40                 | 61.17           |
|        | 850             | 949.96                 | 1236.11                 | 30.12           |

Table ST4. Sensitivity and responsivity measurements of CAS 20, 30 and 40 at various laser power and applied voltage 5V.

| <b>Sample</b> | <b>Power density<br/>(mW/cm<sup>2</sup>)</b> | <b>I<sub>dark</sub><br/>(nA)</b> | <b>I<sub>light</sub> (nA)</b> | <b>Sensitivity<br/>(%)</b> | <b>Responsivity<br/>(AW<sup>-1</sup>) *10<sup>-4</sup></b> |
|---------------|----------------------------------------------|----------------------------------|-------------------------------|----------------------------|------------------------------------------------------------|
| CAS 20        | 0.8                                          | 23.7                             | 48.6                          | 105.06                     | 1.26                                                       |
|               | 2.4                                          | 24.2                             | 62.8                          | 159.50                     | 0.65                                                       |
|               | 3.9                                          | 24.2                             | 71.7                          | 196.28                     | 0.48                                                       |
|               | 7.9                                          | 23.7                             | 88.8                          | 274.68                     | 0.33                                                       |
|               | 11.8                                         | 24.3                             | 100.5                         | 313.16                     | 0.26                                                       |
|               | 15.8                                         | 23.4                             | 109.2                         | 366.23                     | 0.22                                                       |
| CAS 30        | 0.8                                          | 358                              | 363                           | 1.39                       | 0.25                                                       |
|               | 2.4                                          | 358                              | 384                           | 7.26                       | 0.44                                                       |
|               | 3.9                                          | 369                              | 413                           | 11.92                      | 0.45                                                       |
|               | 7.9                                          | 366                              | 446                           | 21.85                      | 0.41                                                       |
|               | 11.8                                         | 391                              | 479                           | 22.82                      | 0.30                                                       |
|               | 15.8                                         | 386                              | 493                           | 27.72                      | 0.27                                                       |
| CAS 40        | 0.8                                          | 979                              | 1002                          | 2.24                       | 1.15                                                       |
|               | 2.4                                          | 1060                             | 1134                          | 6.98                       | 1.25                                                       |
|               | 3.9                                          | 1066                             | 1189                          | 11.53                      | 1.25                                                       |
|               | 7.9                                          | 1076                             | 1359                          | 26.30                      | 1.44                                                       |
|               | 11.8                                         | 1090                             | 1416                          | 29.90                      | 1.10                                                       |
|               | 15.8                                         | 1084                             | 1455                          | 34.22                      | 0.94                                                       |

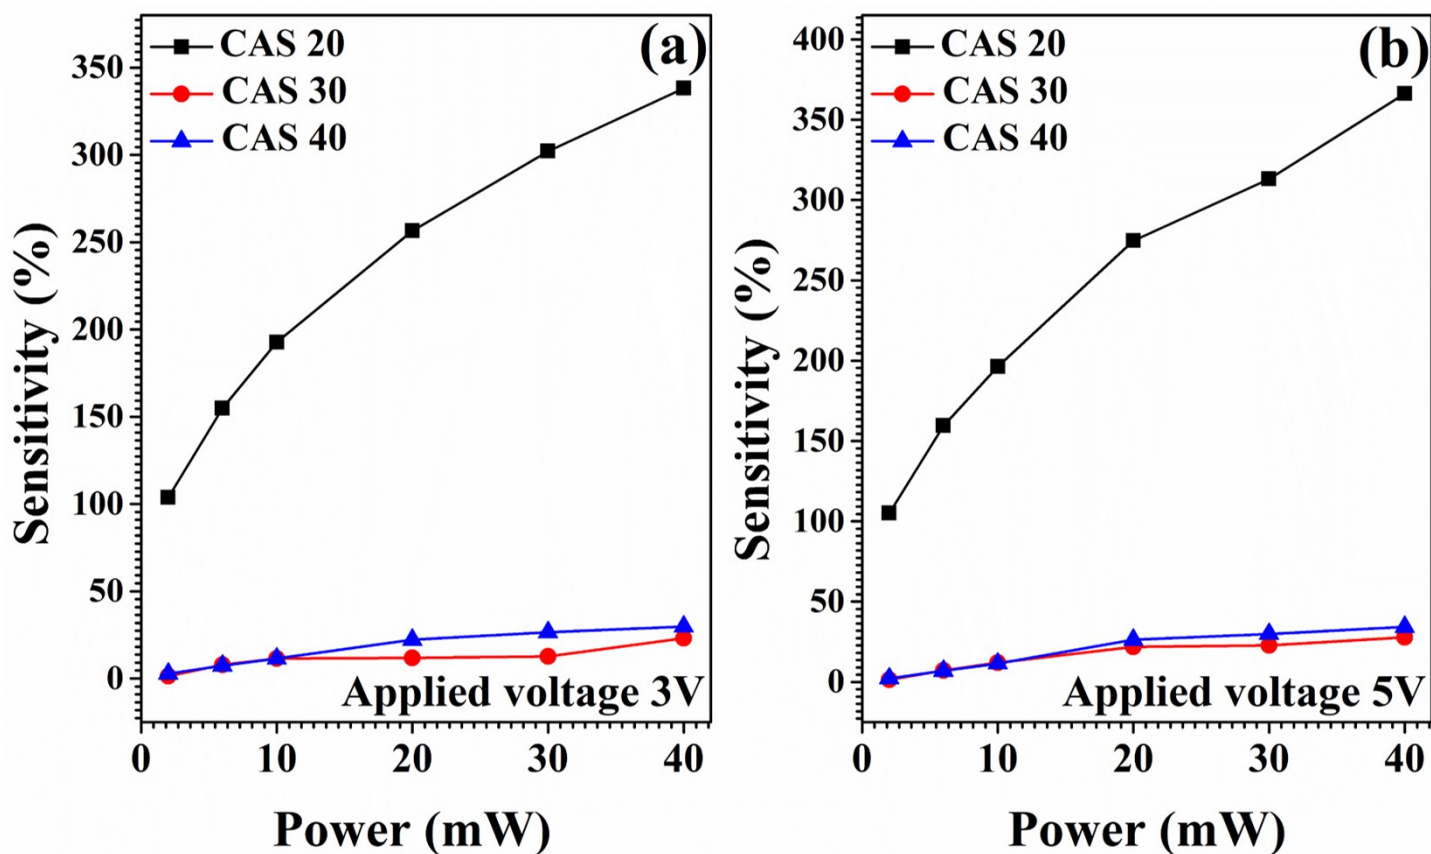

Figure S10. (a) Laser power Vs sensitivity graphs of CAS 20, CAS 30 and CAS 40 samples at applied bias voltage 3V (b) Laser power Vs sensitivity graphs of CAS 20, CAS 30 and CAS 40 samples at applied bias voltage 5V.

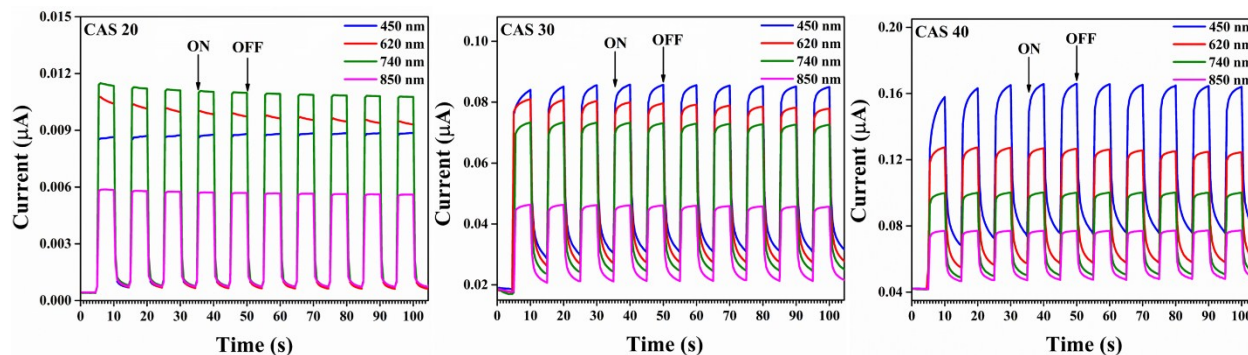

Figure S11: The switching behavior of CAS photodetector (CAS 20, CAS 30 and CAS 40) after 20 weeks, measured under 1V bias using LEDs having wavelengths 450, 620, 740 and 850 nm.
